# Supplementary material for: Combination of Small Extracellular Vesicle-Derived Annexin A2 Protein and mRNA as a Potential Predictive Biomarker for Chemotherapy Responsiveness in Aggressive Triple-Negative Breast Cancer
Source: MDPI journal article supplement (doi:10.3390/cancers15010212), 2022-12-29
Supplement: s1 [file s1]

**Supplementary Table S1:** The sizes and concentrations of the sEVs isolated from different human TNBC patient serum samples using the ExoQuick Ultra kit. The sEVs derived from 3 normal serum samples and 17 TNBC patient serum samples are as follows:

**Supplementary Table S1 :**

| Patient No. | Clinical Prognostic stage | sEV size (nm)  | No. of sEVs x 10 <sup>8</sup> (particles/ml) |
|-------------|---------------------------|----------------|----------------------------------------------|
| 1           | -                         | 105.5 +/- 7.2  | (0.896 +/- 0.0214)                           |
| 2           | -                         | 79.2 +/- 5.2   | (3.5 +/- 0.177)                              |
| 3           | -                         | 85.7 +/- 2.2   | (3.23 +/- 0.097)                             |
| 4           | 1B                        | 87.8 +/- 3.4   | (1.86 +/- 0.155)                             |
| 5           | 1B                        | 89.5 +/- 4.8   | (0.752 +/- 0.0462)                           |
| 6           | 1B                        | 94.8 +/- 7.9   | (1.37 +/- 0.0517)                            |
| 7           | 1B                        | 87.1 +/- 5.3   | (2.44 +/- 0.185)                             |
| 8           | 2A                        | 93.0 +/- 2.8   | (3.89 +/- 0.177)                             |
| 9           | 2B                        | 81.0 +/- 3.0   | (1.98 +/- 0.165)                             |
| 10          | 2B                        | 93 +/- 1.5     | (1.6 +/- 0.1)                                |
| 11          | 2B                        | 83 +/- 3.9     | (2.6 +/- 0.1)                                |
| 12          | 3B                        | 81 +/- 1.1     | (3 +/- 0.2)                                  |
| 13          | 3B                        | 77 +/- 3.9     | (2.1 +/- 0.1)                                |
| 14          | 3B                        | 81 +/- 3.0     | (3.7 +/- 0.2)                                |
| 15          | 3B                        | 88 +/- 4.3     | (2.4 +/- 0.2)                                |
| 16          | 3B                        | 106.0 +/- 13.3 | (2.07 +/- 0.117)                             |
| 17          | 3B                        | 86.0 +/- 5.6   | (2.11 +/- 0.0929)                            |

|    |    |            |                   |
|----|----|------------|-------------------|
| 18 | 3C | 89 +/- 8.5 | (0.651 +/- 0.02 ) |
| 19 | 3C | 78 +/- 5.0 | (2.8 +/- 0.2)     |
| 20 | 4  | 84 +/- 5.2 | (2.6 +/- 0.1)     |
