# Supplementary material for: Combination of Small Extracellular Vesicle-Derived Annexin A2 Protein and mRNA as a Potential Predictive Biomarker for Chemotherapy Responsiveness in Aggressive Triple-Negative Breast Cancer
Source: MDPI journal article supplement (doi:10.3390/cancers15010212), 2022-12-29
Supplement: s1 [file s1]

**Figure S4:**

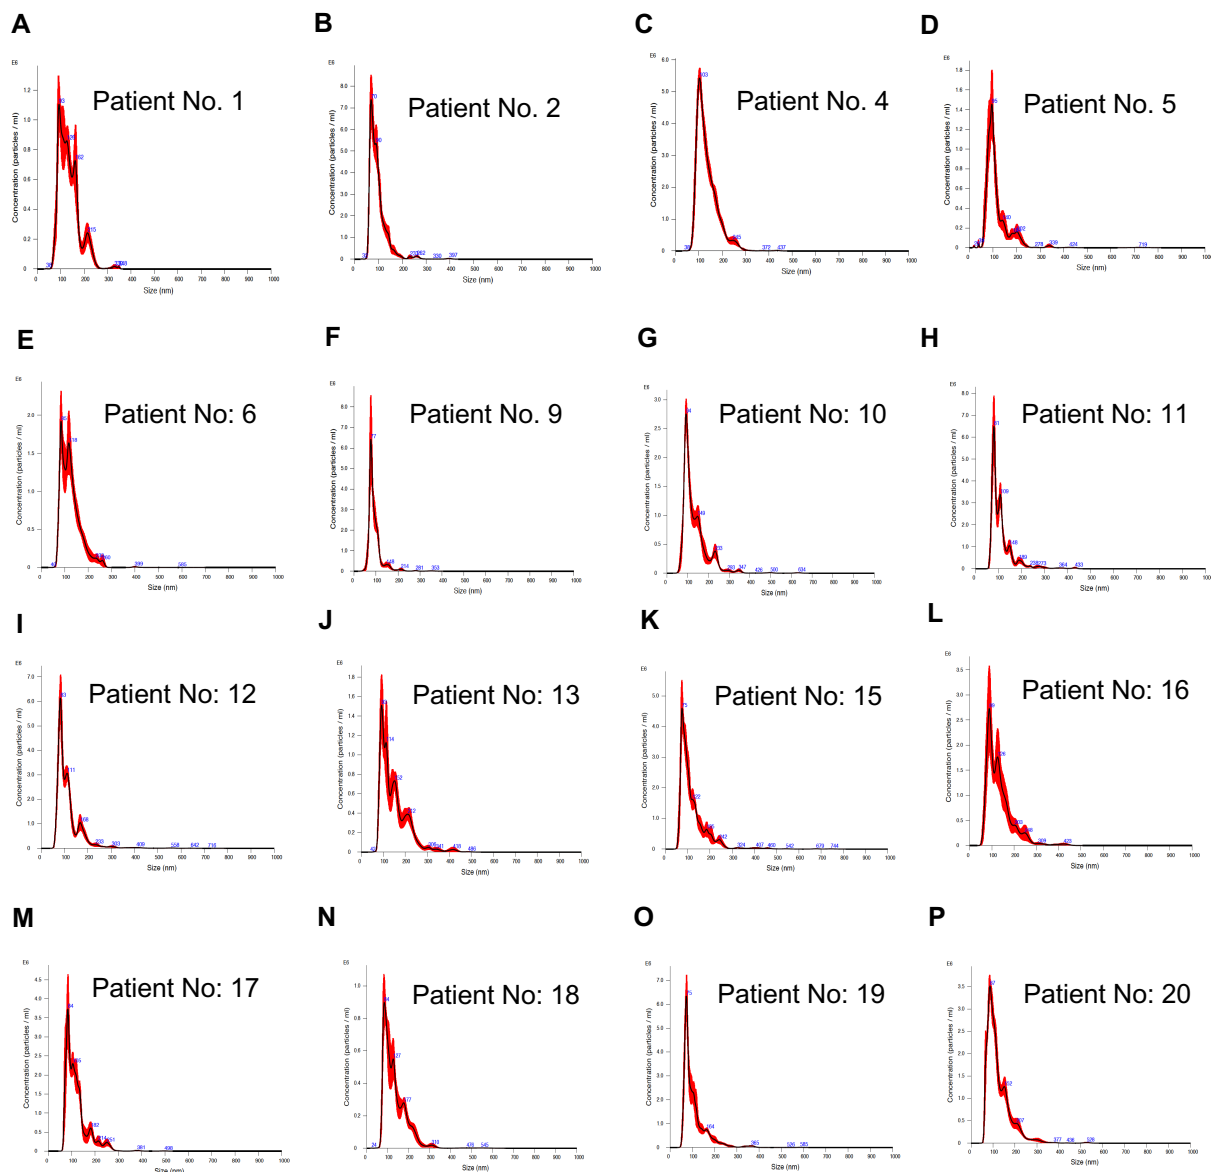

**Supplementary figure S4:** NTA analysis of the sEVs derived from TNBC patients. Patients are denoted as A-P with their patient numbers.
