# Supplementary material for: Combination of Small Extracellular Vesicle-Derived Annexin A2 Protein and mRNA as a Potential Predictive Biomarker for Chemotherapy Responsiveness in Aggressive Triple-Negative Breast Cancer
Source: MDPI journal article supplement (doi:10.3390/cancers15010212), 2022-12-29
Supplement: s1 [file s1]

**Figure S3:**

**IgG depletion from serum samples**

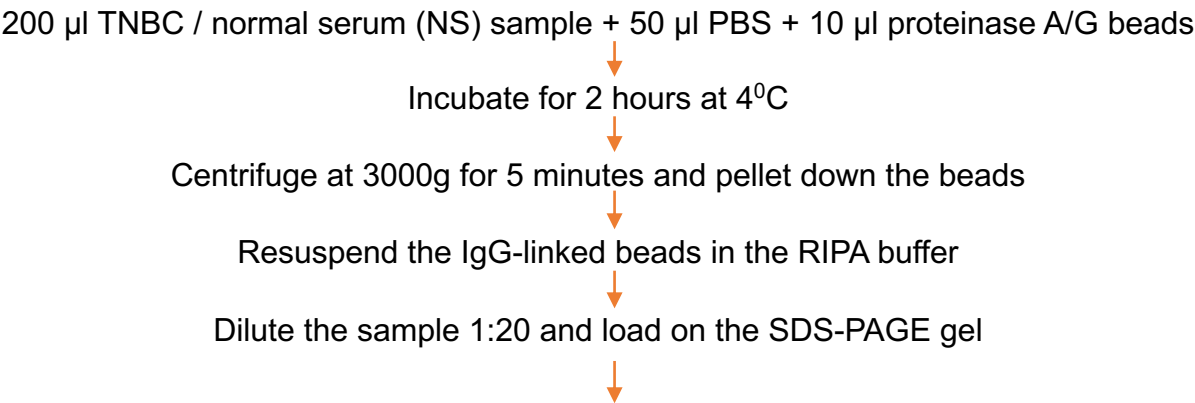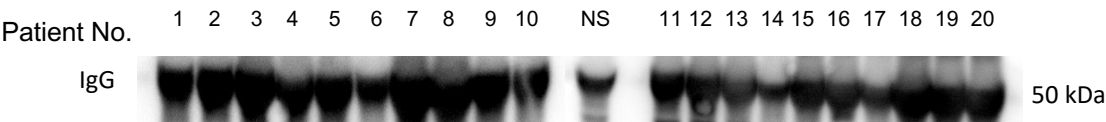

**Supplementary Figure S3:** IgG depletion by using protein A/G beads and its confirmation. Western blot analysis of the protein bead plus IgG linked to it was done by heating the beads in a boiling water bath. The samples were subjected to the SDS-PAGE. Patient samples no 1-20 were confirmed for IgG elution by staining with anti-human IgG antibody.
