# Supplementary figures and images for: Combination of Small Extracellular Vesicle-Derived Annexin A2 Protein and mRNA as a Potential Predictive Biomarker for Chemotherapy Responsiveness in Aggressive Triple-Negative Breast Cancer
Source: MDPI journal article supplement (doi:10.3390/cancers15010212), 2022-12-29

**Figure S5:**

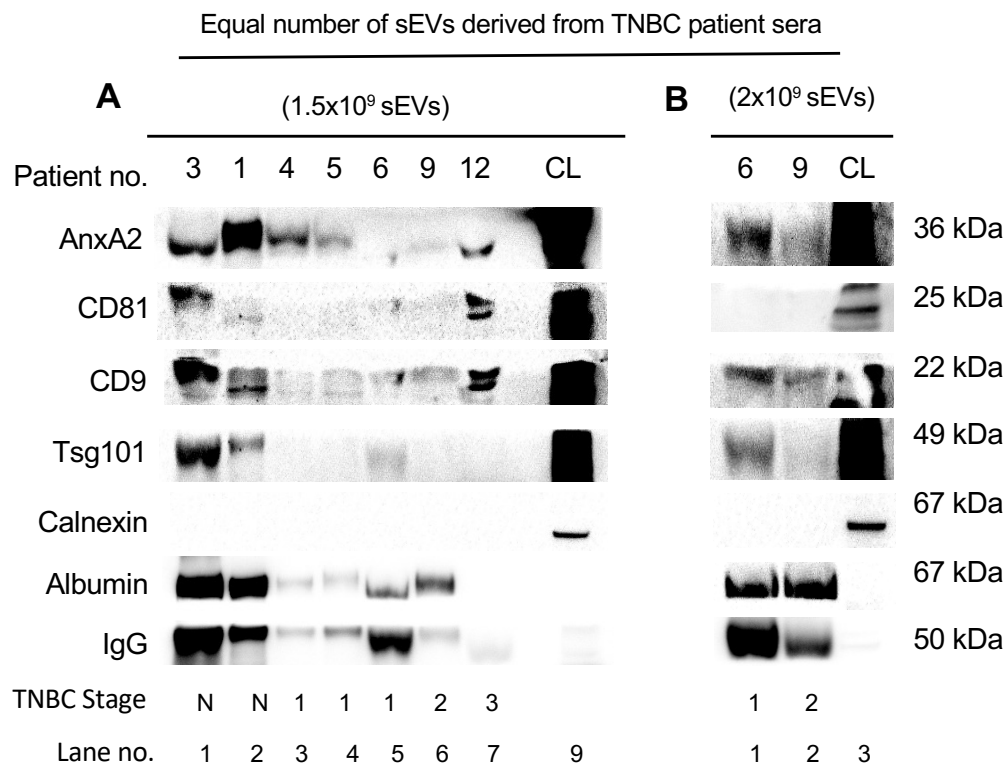

**Figure S5:** Patient sample derived sEVs bearing AnxA2 and other EV markers.

Supplement: s1 [file s1]
